# Supplementary material for: A Computational and Spectroscopic Analysis of Solvate Ionic Liquids Containing Anions with Long and Short Perfluorinated Alkyl Chains
Source: MDPI journal article supplement (doi:10.3390/molecules29092071), 2024-04-30
Supplement: s1 [file s1]

# A Computational and Spectroscopic Analysis of Solvate Ionic Liquids Containing Anions with Long and Short Perfluorinated Alkyl Chains

Karina Shimizu <sup>1</sup>, Adilson Alves de Freitas <sup>1,\*</sup>, Jacob T. Allred <sup>2</sup> and Christopher M. Burba <sup>2,\*</sup>

<sup>1</sup> Centro de Química Estrutural, Institute of Molecular Sciences, Instituto Superior Técnico, Universidade de Lisboa, Av. Rovisco Pais, 1049-001 Lisboa, Portugal; karina.shimizu@tecnico.ulisboa.pt

<sup>2</sup> Department of Natural Sciences, Northeastern State University, 611 N Grand Ave., Tahlequah, OK 74464, USA; allredj@nsuok.edu

\* Correspondence: adilsondefreitas@tecnico.ulisboa.pt (A.A.d.F.); burba@nsuok.edu (C.M.B.)

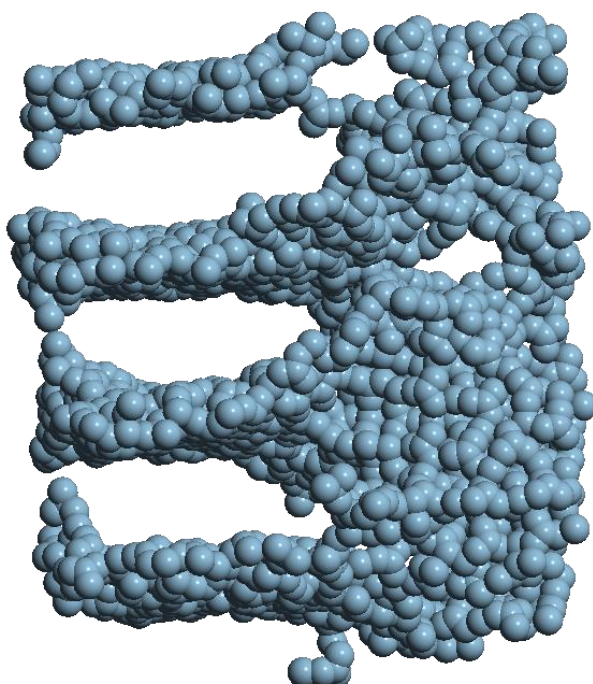

**Figure S1.** Simulation snapshots of pure  $\text{LiC}_4\text{F}_9\text{SO}_3$  at 370 K highlighting the lamellar organization of the polar domains.

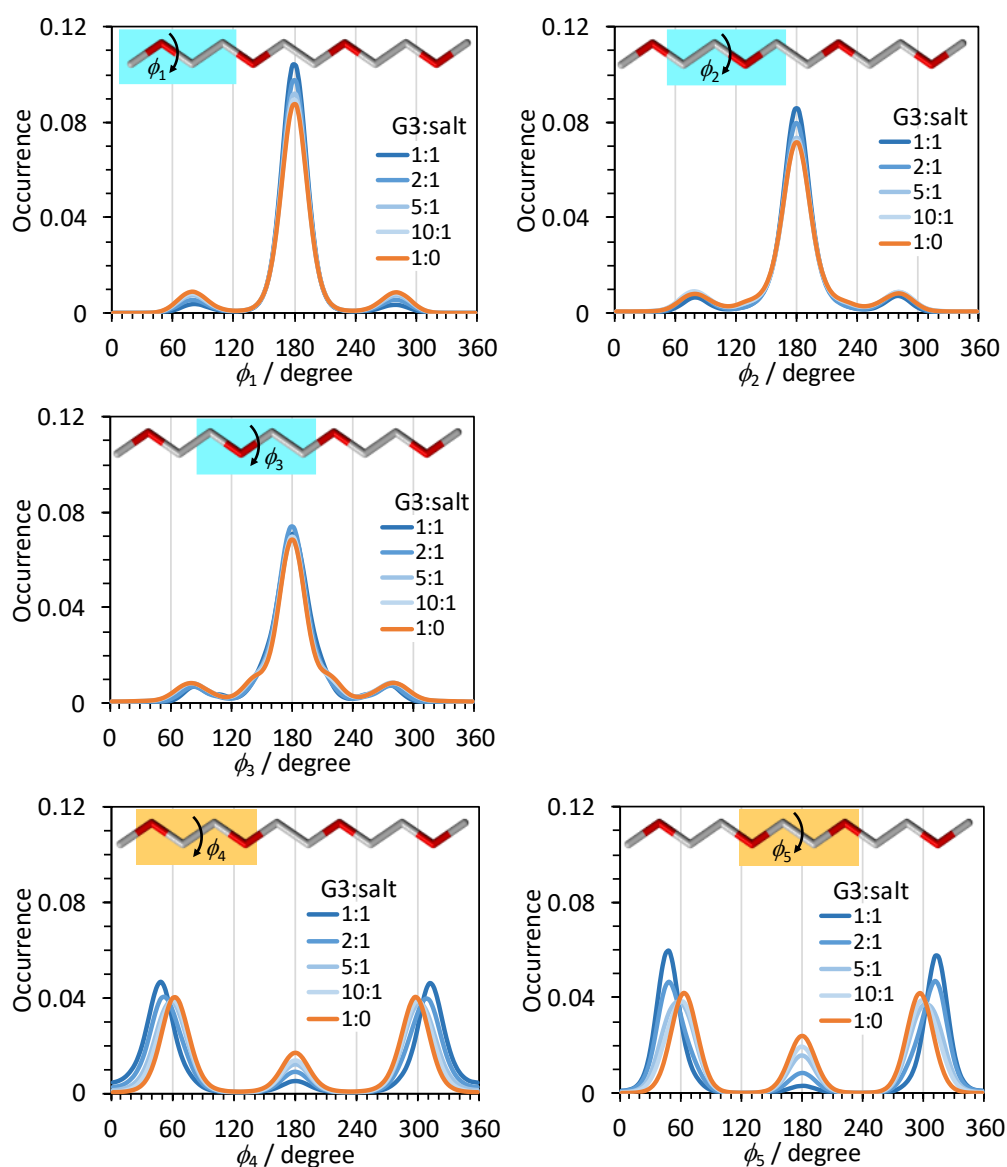

**Figure S2.** Dihedral angle distribution functions of the G3 molecule in  $[(G3)_nLi][C_4F_9SO_3]$  mixtures. Ratios are given as G3:LiC<sub>4</sub>F<sub>9</sub>SO<sub>3</sub>.

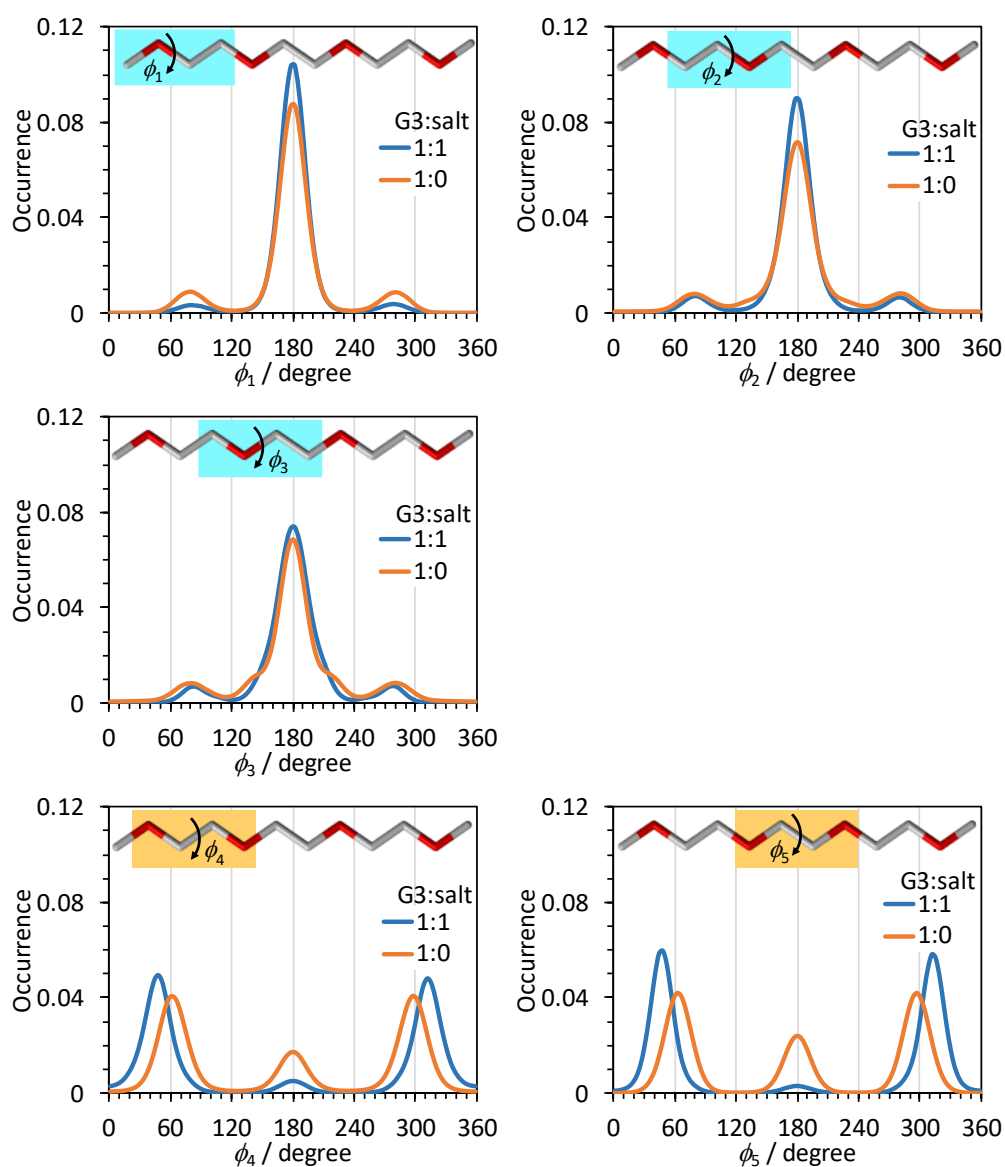

**Figure S3.** Dihedral angle distribution functions of the G3 molecule in  $[(G3)_1Li][CF_3SO_3]$ . Ratios are given as G3:LiCF<sub>3</sub>SO<sub>3</sub>.

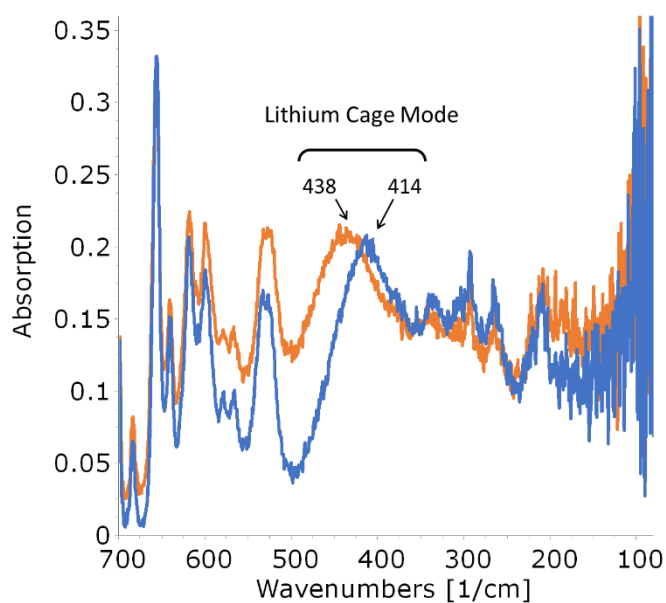

**Figure S4.** Far-IR spectra of  $[(G3)_1Li][C_4F_9SO_3]$  (natural Li isotopic abundance, blue) and lithium-6 enriched  $[(G3)_1Li][C_4F_9SO_3]$  (orange).

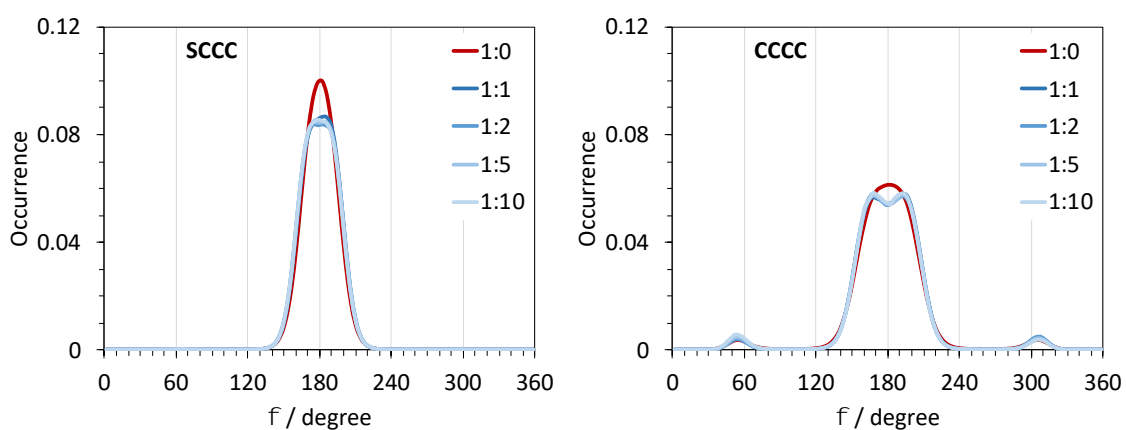

**Figure S5.** Dihedral angle distribution functions of the  $C_4F_9SO_3^-$  ion in  $[(G3)_nLi][C_4F_9SO_3]$  mixtures. Ratios are given as G3:LiC<sub>4</sub>F<sub>9</sub>SO<sub>3</sub>.

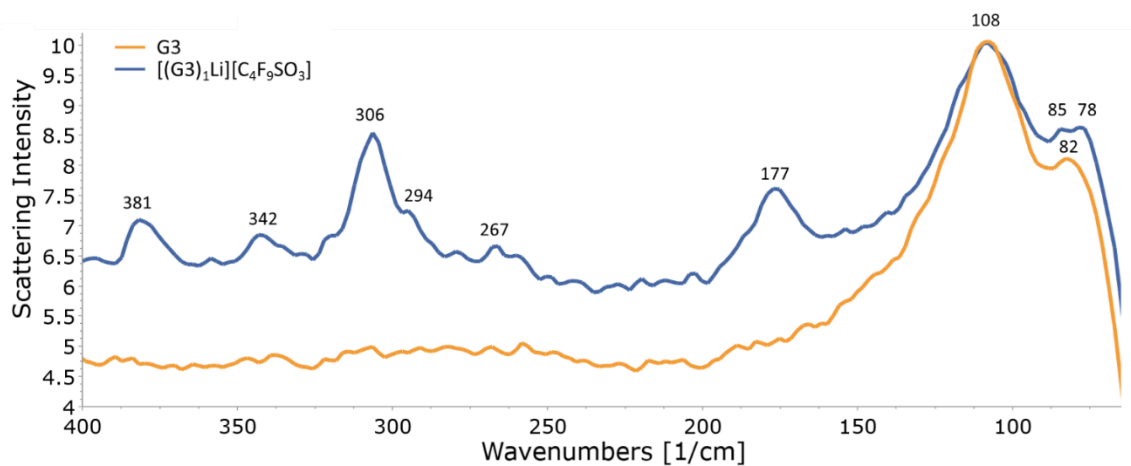

**Figure S6.** Raman spectra of  $[(\text{G3})_1\text{Li}][\text{C}_4\text{F}_9\text{SO}_3]$  and G3.

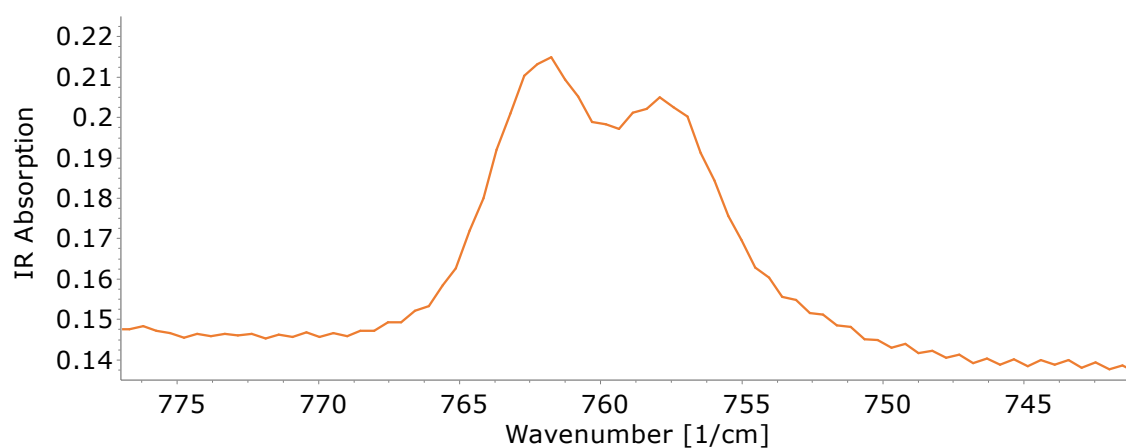

**Figure S7.** Transmission IR spectrum of  $[(\text{G3})_1\text{Li}][\text{CF}_3\text{SO}_3]$  measured by sandwiching the SIL between ZnSe windows. The region shown contains the  $\delta_s(\text{CF}_3)$  band.

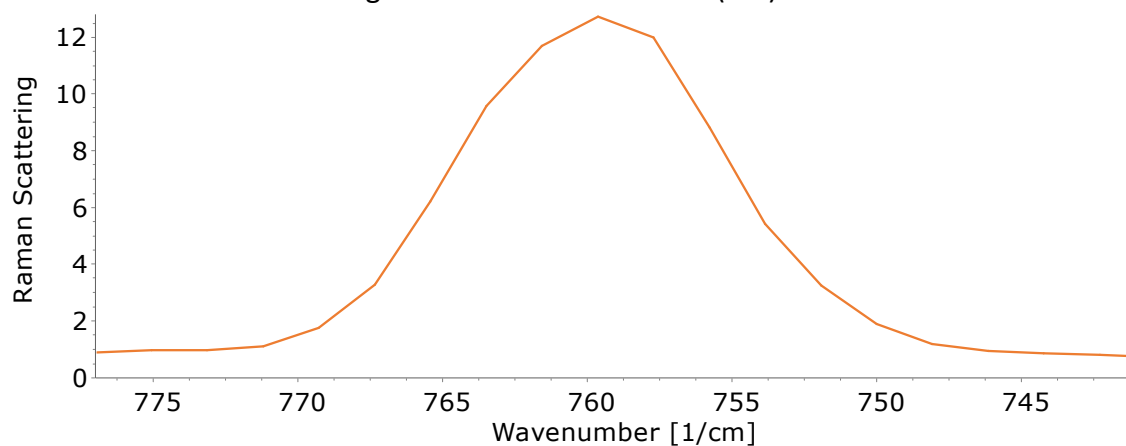

**Figure S8.** Raman spectrum of  $[(\text{G3})_1\text{Li}][\text{CF}_3\text{SO}_3]$ . The region shown contains the  $\delta_s(\text{CF}_3)$  band.

**Table S1.** Calculated vibrational mode frequencies ( $\text{cm}^{-1}$ ), IR intensities ( $\text{km mol}^{-1}$ ), and Raman activities ( $\text{\AA}^4 \text{amu}^{-1}$ ) for the  $\text{C}_4\text{F}_9\text{SO}_3^-$  anion in various conformations.

|      | tt Conformer |              |                | $\text{tg}^-$ Conformer |              |                | $\text{tg}^+$ Conformer |              |                | $\text{g}^+\text{t}$ Conformer |              |                | $\text{g}^-\text{t}$ Conformer |              |                |
|------|--------------|--------------|----------------|-------------------------|--------------|----------------|-------------------------|--------------|----------------|--------------------------------|--------------|----------------|--------------------------------|--------------|----------------|
| Mode | Frequency    | IR Intensity | Raman Activity | Frequency               | IR Intensity | Raman Activity | Frequency               | IR Intensity | Raman Activity | Frequency                      | IR Intensity | Raman Activity | Frequency                      | IR Intensity | Raman Activity |
| 1    | 28.4         | 0.0          | 0.0            | 33.4                    | 0.3          | 0.0            | 32.6                    | 0.3          | 0.0            | 32.1                           | 0.3          | 0.0            | 40.1                           | 0.3          | 0.0            |
| 2    | 44.1         | 0.6          | 0.8            | 50.1                    | 0.4          | 0.0            | 49.3                    | 0.4          | 0.0            | 45.6                           | 0.5          | 0.1            | 48.4                           | 0.5          | 0.0            |
| 3    | 56.1         | 0.2          | 0.0            | 63.8                    | 0.3          | 0.0            | 63.5                    | 0.3          | 0.0            | 66.9                           | 0.8          | 0.3            | 69.5                           | 0.8          | 0.0            |
| 4    | 60.0         | 0.4          | 0.4            | 83.2                    | 0.3          | 0.0            | 83.4                    | 0.3          | 0.0            | 81.2                           | 0.1          | 0.1            | 83.3                           | 0.1          | 0.0            |
| 5    | 97.9         | 1.3          | 0.1            | 106.7                   | 0.9          | 0.1            | 106.6                   | 0.9          | 0.1            | 106.9                          | 1.9          | 0.0            | 109.1                          | 1.9          | 0.1            |
| 6    | 156.1        | 1.0          | 2.4            | 132.9                   | 0.9          | 0.7            | 133.0                   | 0.9          | 0.7            | 133.3                          | 3.0          | 0.1            | 132.9                          | 3.0          | 0.4            |
| 7    | 167.8        | 0.1          | 0.6            | 177.2                   | 1.8          | 1.3            | 177.2                   | 1.8          | 1.3            | 180.4                          | 0.3          | 1.7            | 182.9                          | 0.3          | 0.5            |
| 8    | 190.8        | 1.0          | 0.1            | 198.6                   | 0.3          | 0.4            | 198.6                   | 0.3          | 0.3            | 189.2                          | 0.7          | 0.4            | 188.5                          | 0.7          | 0.2            |
| 9    | 213.2        | 1.6          | 1.1            | 221.1                   | 1.8          | 0.1            | 221.1                   | 1.8          | 0.1            | 217.6                          | 1.7          | 3.5            | 217.8                          | 1.7          | 0.3            |
| 10   | 240.0        | 0.3          | 1.3            | 227.3                   | 0.5          | 0.8            | 227.3                   | 0.5          | 0.8            | 235.1                          | 0.3          | 0.2            | 233.8                          | 0.3          | 0.3            |
| 11   | 241.7        | 0.0          | 0.2            | 242.3                   | 0.8          | 1.5            | 242.4                   | 0.8          | 1.5            | 243.4                          | 0.3          | 0.7            | 245.6                          | 0.3          | 0.6            |
| 12   | 247.9        | 0.3          | 0.5            | 259.5                   | 1.8          | 0.9            | 259.3                   | 1.8          | 0.9            | 255.2                          | 0.0          | 12.0           | 257.8                          | 0.0          | 4.1            |
| 13   | 284.7        | 0.2          | 4.7            | 285.2                   | 0.2          | 4.2            | 285.5                   | 0.2          | 4.1            | 283.4                          | 0.1          | 4.0            | 283.4                          | 0.1          | 2.0            |
| 14   | 286.8        | 2.2          | 1.5            | 294.5                   | 0.3          | 1.9            | 294.5                   | 0.3          | 1.9            | 289.0                          | 2.6          | 1.1            | 287.4                          | 2.6          | 0.7            |
| 15   | 300.7        | 0.2          | 3.0            | 309.4                   | 0.4          | 0.5            | 309.3                   | 0.4          | 0.5            | 311.0                          | 0.6          | 3.7            | 311.5                          | 0.6          | 1.2            |
| 16   | 327.7        | 0.2          | 0.8            | 315.9                   | 0.6          | 1.1            | 315.9                   | 0.6          | 1.1            | 327.9                          | 0.3          | 2.6            | 329.1                          | 0.3          | 2.6            |
| 17   | 353.0        | 0.4          | 0.3            | 345.1                   | 0.4          | 0.9            | 345.0                   | 0.4          | 0.9            | 336.8                          | 0.3          | 0.9            | 336.1                          | 0.3          | 0.5            |
| 18   | 364.0        | 1.3          | 0.3            | 362.9                   | 0.1          | 1.7            | 362.9                   | 0.1          | 1.7            | 359.9                          | 1.3          | 1.2            | 359.9                          | 1.3          | 1.4            |
| 19   | 372.2        | 0.2          | 1.8            | 379.4                   | 1.4          | 0.6            | 379.4                   | 1.4          | 0.6            | 381.3                          | 1.5          | 0.5            | 380.2                          | 1.5          | 0.6            |
| 20   | 445.1        | 0.5          | 0.2            | 438.0                   | 3.4          | 0.5            | 437.9                   | 3.4          | 0.5            | 430.4                          | 2.2          | 1.0            | 431.5                          | 2.2          | 0.3            |
| 21   | 494.6        | 29.9         | 1.7            | 497.0                   | 12.8         | 0.4            | 496.7                   | 12.8         | 0.4            | 493.6                          | 22.6         | 1.7            | 494.4                          | 22.6         | 0.9            |
| 22   | 508.4        | 12.5         | 0.5            | 498.9                   | 15.8         | 1.4            | 498.7                   | 15.8         | 1.4            | 504.6                          | 12.3         | 1.9            | 505.0                          | 12.3         | 1.0            |
| 23   | 516.8        | 9.0          | 1.0            | 516.4                   | 10.3         | 1.1            | 516.3                   | 10.2         | 1.1            | 515.3                          | 2.5          | 0.5            | 517.1                          | 2.5          | 0.3            |

|      | tt Conformer |              |                | tg <sup>-</sup> Conformer |              |                | tg <sup>+</sup> Conformer |              |                | g <sup>+</sup> t Conformer |              |                | g <sup>-</sup> t Conformer |              |                |
|------|--------------|--------------|----------------|---------------------------|--------------|----------------|---------------------------|--------------|----------------|----------------------------|--------------|----------------|----------------------------|--------------|----------------|
| Mode | Frequency    | IR Intensity | Raman Activity | Frequency                 | IR Intensity | Raman Activity | Frequency                 | IR Intensity | Raman Activity | Frequency                  | IR Intensity | Raman Activity | Frequency                  | IR Intensity | Raman Activity |
| 24   | 542.2        | 9.0          | 1.9            | 537.8                     | 13.3         | 2.4            | 537.6                     | 13.2         | 2.4            | 525.3                      | 12.4         | 3.1            | 527.5                      | 12.4         | 2.8            |
| 25   | 557.7        | 4.3          | 0.5            | 561.5                     | 8.1          | 0.7            | 561.5                     | 8.1          | 0.7            | 569.3                      | 18.5         | 0.7            | 569.9                      | 18.5         | 0.7            |
| 26   | 581.1        | 67.3         | 1.1            | 575.6                     | 24.9         | 1.5            | 575.6                     | 25.1         | 1.5            | 584.8                      | 6.4          | 1.3            | 584.2                      | 6.4          | 1.3            |
| 27   | 600.8        | 95.8         | 2.0            | 612.2                     | 155.3        | 0.9            | 612.0                     | 155.2        | 0.9            | 604.2                      | 94.1         | 1.0            | 603.7                      | 94.1         | 0.8            |
| 28   | 627.0        | 56.2         | 2.4            | 633.5                     | 12.8         | 2.7            | 633.5                     | 12.3         | 2.7            | 622.8                      | 61.0         | 2.2            | 623.0                      | 61.0         | 2.8            |
| 29   | 681.2        | 24.4         | 1.2            | 662.4                     | 24.5         | 4.5            | 662.4                     | 24.5         | 4.5            | 665.8                      | 17.5         | 3.5            | 666.1                      | 17.5         | 4.2            |
| 30   | 712.2        | 34.2         | 7.7            | 729.3                     | 20.6         | 9.9            | 729.3                     | 20.7         | 9.9            | 724.9                      | 37.7         | 11.4           | 726.4                      | 37.7         | 9.6            |
| 31   | 772.4        | 30.6         | 6.5            | 811.6                     | 70.2         | 1.5            | 811.7                     | 70.5         | 1.5            | 847.4                      | 179.2        | 1.1            | 849.1                      | 179.2        | 0.1            |
| 32   | 979.5        | 25.1         | 24.7           | 977.9                     | 12.7         | 23.0           | 977.8                     | 12.2         | 23.2           | 947.1                      | 56.0         | 16.9           | 946.4                      | 56.0         | 9.9            |
| 33   | 1013.1       | 152.3        | 13.4           | 1000.0                    | 269.5        | 15.9           | 999.9                     | 269.9        | 15.7           | 999.1                      | 57.0         | 19.7           | 998.4                      | 57.0         | 24.4           |
| 34   | 1080.9       | 44.4         | 9.0            | 1076.9                    | 46.3         | 1.6            | 1077.0                    | 46.2         | 1.6            | 1082.4                     | 56.3         | 3.3            | 1080.4                     | 56.3         | 2.5            |
| 35   | 1100.5       | 21.0         | 6.6            | 1093.4                    | 26.5         | 0.9            | 1093.4                    | 26.5         | 0.9            | 1083.1                     | 111.3        | 4.0            | 1085.4                     | 111.3        | 4.2            |
| 36   | 1106.4       | 82.4         | 2.2            | 1106.7                    | 62.3         | 4.9            | 1106.5                    | 62.4         | 4.9            | 1113.5                     | 21.9         | 4.9            | 1116.0                     | 21.9         | 5.6            |
| 37   | 1141.4       | 65.8         | 0.8            | 1135.6                    | 92.4         | 1.8            | 1135.5                    | 91.3         | 1.8            | 1130.5                     | 55.6         | 1.8            | 1131.4                     | 55.6         | 0.6            |
| 38   | 1156.2       | 162.7        | 2.4            | 1145.2                    | 105.2        | 2.8            | 1145.3                    | 106.1        | 2.8            | 1158.6                     | 170.1        | 3.9            | 1160.1                     | 170.1        | 2.2            |
| 39   | 1166.0       | 207.9        | 7.2            | 1170.3                    | 260.8        | 2.1            | 1170.3                    | 261.4        | 2.1            | 1173.6                     | 40.5         | 3.3            | 1173.7                     | 40.5         | 2.4            |
| 40   | 1197.1       | 275.4        | 3.2            | 1205.8                    | 213.2        | 1.0            | 1205.8                    | 210.3        | 1.1            | 1189.4                     | 371.0        | 1.6            | 1190.4                     | 371.0        | 1.6            |
| 41   | 1228.7       | 288.6        | 11.4           | 1226.2                    | 162.0        | 11.3           | 1226.0                    | 168.2        | 11.3           | 1216.0                     | 61.0         | 10.0           | 1219.6                     | 61.0         | 2.1            |
| 42   | 1230.5       | 80.6         | 4.2            | 1236.0                    | 400.7        | 7.8            | 1235.7                    | 404.7        | 7.7            | 1233.3                     | 456.5        | 6.0            | 1232.8                     | 456.5        | 5.3            |
| 43   | 1234.3       | 476.7        | 7.6            | 1238.4                    | 270.0        | 10.0           | 1238.3                    | 263.5        | 10.1           | 1236.6                     | 393.0        | 10.5           | 1236.4                     | 393.0        | 10.8           |
| 44   | 1257.0       | 37.2         | 8.6            | 1255.9                    | 60.6         | 5.7            | 1255.9                    | 59.5         | 5.7            | 1270.8                     | 17.6         | 5.8            | 1273.7                     | 17.6         | 4.9            |
| 45   | 1326.7       | 77.8         | 8.0            | 1325.1                    | 51.3         | 4.5            | 1325.2                    | 51.2         | 4.5            | 1320.2                     | 63.7         | 10.0           | 1324.6                     | 63.7         | 5.8            |
